# Supplementary material
Source: PubMed Central journal article supplement (PMC1560365)

# Supplementary Figure 1 McAinsh et al.

A

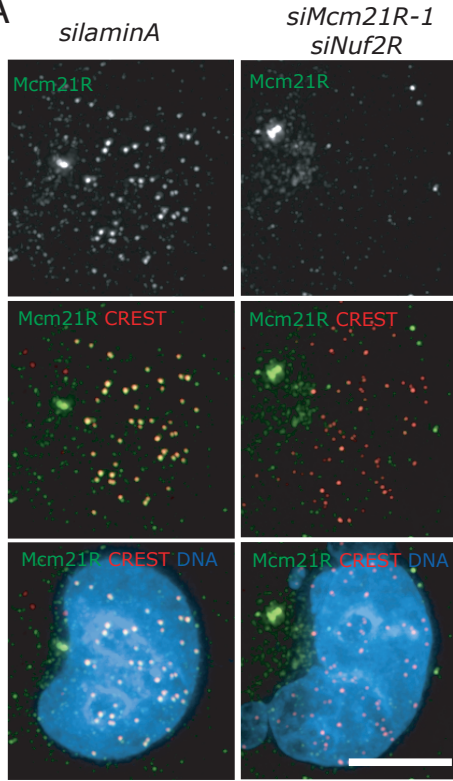

B

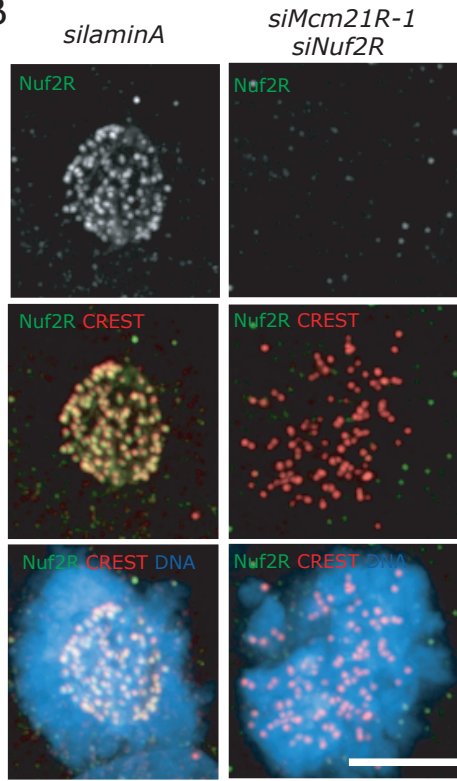

C

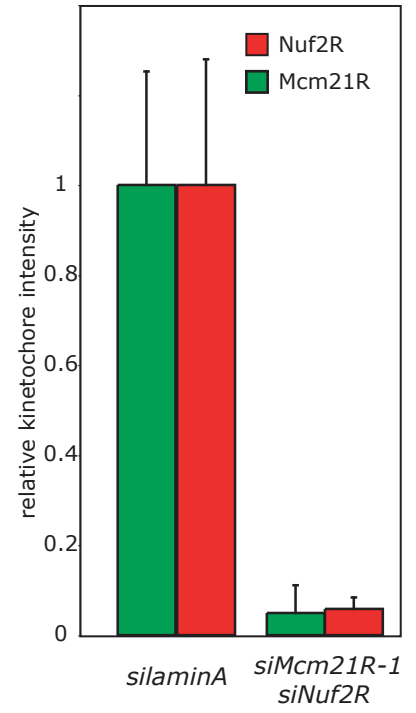

Supplement: 7601293s4.pdf [file 7601293s4.pdf]
